# Supplementary material
Source: HighWire-hosted journal article supplement (http://www.jneurosci.org/highwire/filestream/600500/field_highwire_adjunct_files/2/Figure_S3.pdf)

**TH****3A10****A** \***B****C** +**D****E** \***F****G** +**H**

MO control

MO *tfap2a*

MO control

MO *tfap2a***ast<sup>ti272</sup>****WT**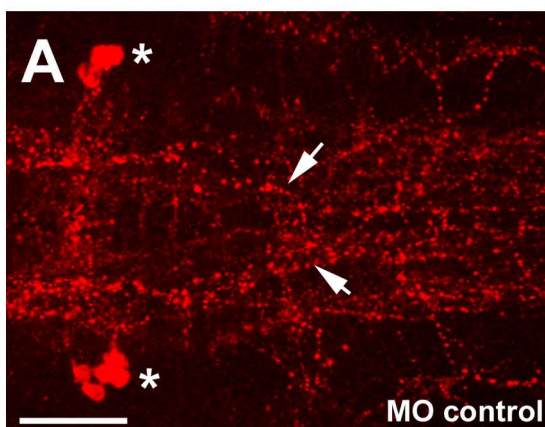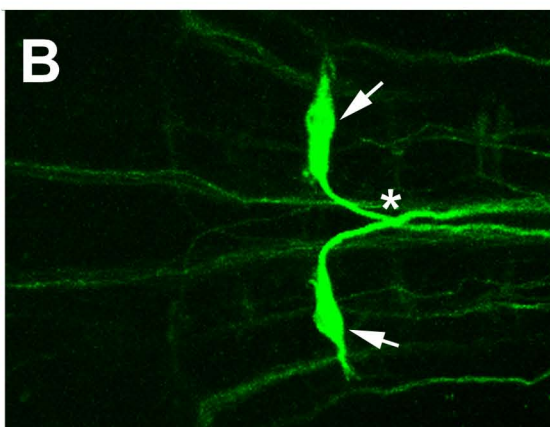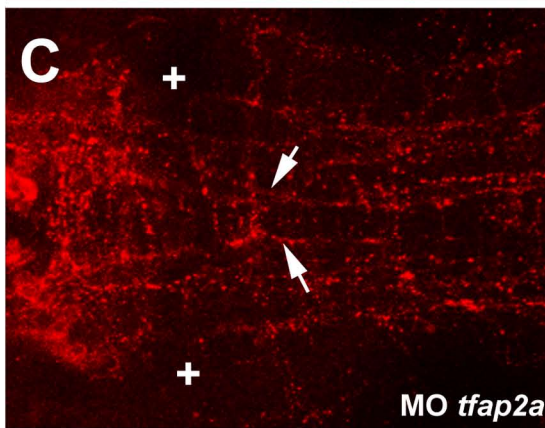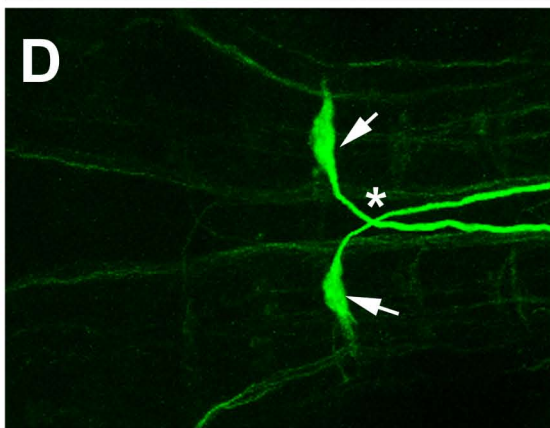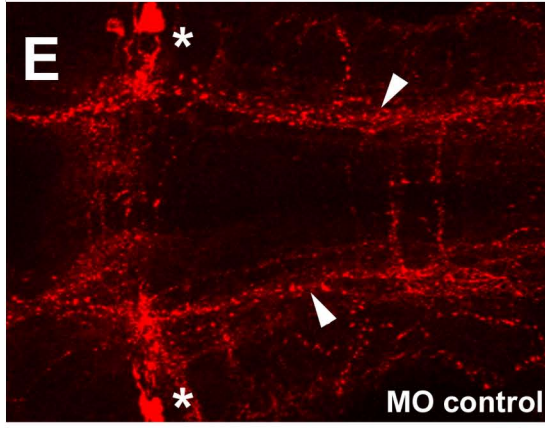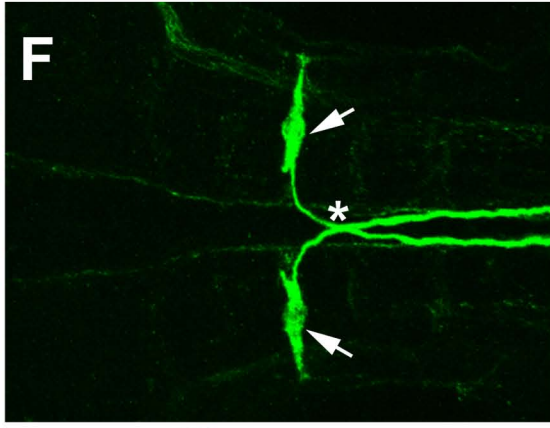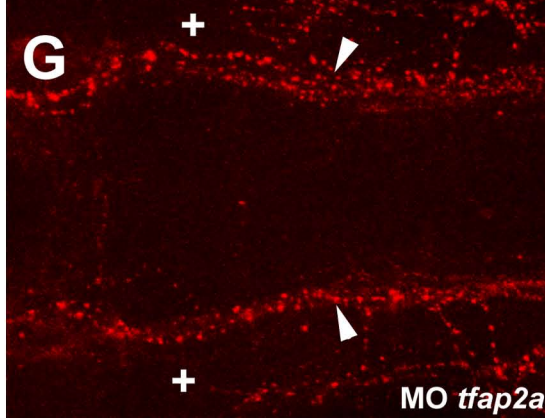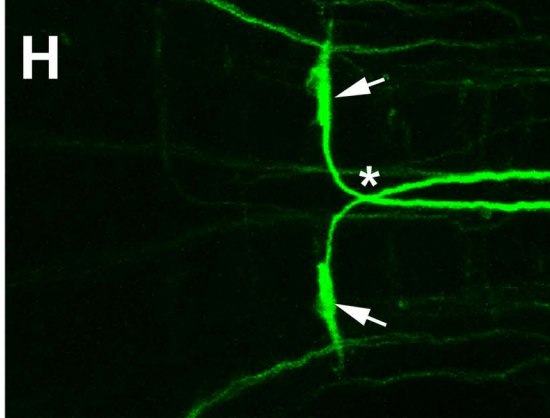

Supplement: Figure_S3.pdf [file Figure_S3.pdf]
